# Supplementary material
Source: publisher site journal article supplement (https://www.dovepress.com/article/534166)
Supplement: Supplementary file 1 [file 534166%20Supplementary%20material.docx]

**Supplementary Material**

**Objective data Questions**

- ID number:
- KA00…………
- Age: …………
- Gender:
- Male
- Female
- Date of 1st operation: …………
- Date of 2nd operation: …………
- Surgeon
- Teaching case 1st eye
- Yes
- No
- Teaching case 2nd eye
- Yes
- No
- Type of cataract 1st eye
- Early
- Moderate
- Dense
- Mature
- Type of cataract 2nd eye
- Early
- Moderate
- Dense
- Mature
- Mode of anesthesia 1st eye
- Topical
- Retrobulbar
- Mode of anesthesia 2nd eye
- Topical
- Retrobulbar
- Medical history of the patient
- No
- DM
- HTN
- Past ocular history

………………….

- Any preoperative sedative medications, as alprazolam 1st eye
- Yes
- No
- Any preoperative sedative medications, as alprazolam 2nd eye
- Yes
- No

**Subjective data questions**

- VAS score of pain during the 1st operation
- 1
- 2
- 3
- 4
- 5
- 6
- 7
- 8
- 9
- 10
- VAS score of pain during the 2nd operation
- 1
- 2
- 3
- 4
- 5
- 6
- 7
- 8
- 9
- 10
- Intraoperative subjective pain of 1st eye
- None
- Mild
- Moderate
- Severe
- Intraoperative subjective pain of 2nd eye
- None
- Mild
- Moderate
- Severe
- Postoperative one day subjective pain of 1st eye
- None
- Mild
- Moderate
- Severe
- Postoperative one day subjective pain of 2nd eye
- None
- Mild
- Moderate
- Severe
- Estimated time of operation of 1st eye
- Short
- Moderate
- Long
- Estimated time of operation of 2nd eye
- Short
- Moderate
- Long
- Visual recovery of 1st eye
- Short
- Moderate
- Long
- Visual recovery of 2nd eye
- Short
- Moderate
- Long
- Final visual acuity of 1st eye "subjective"
- Poor satisfaction
- Moderate satisfaction
- good satisfaction
- Final visual acuity of 2nd eye "subjective"
- Poor satisfaction
- Moderate satisfaction
- good satisfaction

*** For the previous questions, include the comparison

- What did you recall during the 1st operation
- Light
- Color
- Surgical instrument
- Music
- Talking
- Equipment noise
- Nice staff
- Angry staff
- What did you recall during the 2nd operation
- Light
- Color
- Surgical instrument
- Music
- Talking
- Equipment noise
- Nice staff
- Angry staff
- Overall experience first vs IN COMPARISON second eye
- Same
- Better
- Worse
